# Supplementary material for: Integrated Network Pharmacology Approach for Drug Combination Discovery: A Multi-Cancer Case Study
Source: MDPI journal article supplement (doi:10.3390/cancers14082043), 2022-04-18
Supplement: s1 [file s1]

**Table S1:** Sources used in the respective UKS layers to create the gene - gene network used in this study, together with their data types used and assigned data layers.

| Source                                               | Data Type                           | Data Layer  | Website URL                                                                                                         |
|------------------------------------------------------|-------------------------------------|-------------|---------------------------------------------------------------------------------------------------------------------|
| STRING ( <a href="#">Szkarczyk et al. 2019</a> )     | PPI                                 | Interaction | <a href="https://string-db.org/">https://string-db.org/</a>                                                         |
| HIPPIE ( <a href="#">Alanis-Lobato et al. 2017</a> ) | PPI                                 | Interaction | <a href="http://cbdm-01.zdv.uni-mainz.de/~mschaefer/hippie/">http://cbdm-01.zdv.uni-mainz.de/~mschaefer/hippie/</a> |
| HitPredict ( <a href="#">Patil et al. 2011</a> )     | PPI                                 | Interaction | <a href="http://www.hitpredict.org/">http://www.hitpredict.org/</a>                                                 |
| KEGG ( <a href="#">Kanehisa et al. 2021</a> )        | PPI                                 | Interaction | <a href="https://www.genome.jp/kegg/">https://www.genome.jp/kegg/</a>                                               |
| Reactome ( <a href="#">Jassal et al. 2020</a> )      | PPI                                 | Interaction | <a href="https://reactome.org/">https://reactome.org/</a>                                                           |
| Ensembl ( <a href="#">Howe et al. 2021</a> )         | Paralog Information                 | Interaction | <a href="https://www.ensembl.org/">https://www.ensembl.org/</a>                                                     |
| Panther ( <a href="#">Mi et al. 2021</a> )           | Protein Family Gene assignment      | Interaction | <a href="http://www.pantherdb.org/">http://www.pantherdb.org/</a>                                                   |
| GO ( <a href="#">Ashburner et al. 2000</a> )         | Cellular Component Gene association | Interaction | <a href="http://geneontology.org/">http://geneontology.org/</a>                                                     |
| GO ( <a href="#">Ashburner et al. 2000</a> )         | Biological Process Gene association | Functional  | <a href="http://geneontology.org/">http://geneontology.org/</a>                                                     |
| GO ( <a href="#">Ashburner et al. 2000</a> )         | Molecular Function Gene association | Functional  | <a href="http://geneontology.org/">http://geneontology.org/</a>                                                     |
| TargetScan ( <a href="#">McGeary et al. 2019</a> )   | mirRNA regulates Gene               | Regulation  | <a href="http://www.targetscan.org/">http://www.targetscan.org/</a>                                                 |
| TRRUST ( <a href="#">Han et al. 2018</a> )           | Gene regulates Gene                 | Regulation  | <a href="https://www.grnpedia.org/trrust/">https://www.grnpedia.org/trrust/</a>                                     |
| JASPAR ( <a href="#">Fornes et al. 2020</a> )        | Gene regulates Gene                 | Regulation  | <a href="https://jaspar.gene-reg.net/">https://jaspar.gene-reg.net/</a>                                             |
| KEGG ( <a href="#">Kanehisa</a> )                    | Gene Pathway                        | Functional  |                                                                                                                     |

|                                                     |                           |            |                                                                           |
|-----------------------------------------------------|---------------------------|------------|---------------------------------------------------------------------------|
| <a href="#">et al. 2021)</a>                        | associations              |            | <a href="https://www.genome.jp/kegg/">https://www.genome.jp/kegg/</a>     |
| Reactome ( <a href="#">Jassal et al. 2020)</a>      | Gene Pathway associations | Functional | <a href="https://reactome.org/">https://reactome.org/</a>                 |
| WikiPathways ( <a href="#">Martens et al. 2021)</a> | Gene Pathway associations | Functional | <a href="https://www.wikipathways.org/">https://www.wikipathways.org/</a> |

**Table S2:** Overview of general network characteristics for each of the investigated cancers.

| Cancer type                         | number of paired cancer/normal samples | number of genes - edges in the cancer network | number of genes - edges in the prior network | number of drugs investigated in this study |
|-------------------------------------|----------------------------------------|-----------------------------------------------|----------------------------------------------|--------------------------------------------|
| Invasive Breast Cancer (BRCA)       | 112 - 224                              | 4,568 - 1,441,146                             | 2,566 - 242,226                              | 316                                        |
| Colon adenocarcinoma (COAD)         | 41 - 82                                | 4,416 - 1,111,603                             | 2,254 - 190,091                              | 62                                         |
| Hepatocellular carcinoma (LIHC)     | 50 - 100                               | 3,965 - 715,499                               | 2,369 - 133,105                              | 11                                         |
| Lung squamous cell carcinoma (LUSC) | 49 - 98                                | 4035 - 2,795,288                              | 2,648 - 426,679                              | 87                                         |
| Prostate adenocarcinoma (PRAD)      | 52 - 104                               | 4,477 - 681,517                               | 2,131 - 119,770                              | 294                                        |

**Table S3** - Results of the pipeline for invasive breast cancer (BRCA). In each row are indicated the drugs in the combination, the frequency of occurrence in the output of the genetic algorithm, their targets, the respective disease network rank and the area of action in terms of number of genes.

| Drug 1        | Drug 2           | Occurrence in GA solutions | Target genes 1                                              | Target genes 2                                              | BRCA network rank 1                         | BRCA network rank 2                         | Estimated area of action (nodes) |
|---------------|------------------|----------------------------|-------------------------------------------------------------|-------------------------------------------------------------|---------------------------------------------|---------------------------------------------|----------------------------------|
| carbetocin    | betahistine      | 7                          | OXTR                                                        | HRH3                                                        | 1199                                        | 2322                                        | 283                              |
| methimazole   | carbetocin       | 6                          | TPO                                                         | OXTR                                                        | 906                                         | 1199                                        | 436                              |
| paclitaxel    | nicotine         | 6                          | TUBA1C;TUBB4A;TUBB2B;TUBA3C;TUBA3E;TUBB3                    | CHRNA4                                                      | 350;1269;1403;1837;2106;2304                | 2417                                        | 713                              |
| gaboxadol     | carbetocin       | 5                          | GABRA3;GABRA2;GABRA5;GABRA4                                 | OXTR                                                        | 1081;1586;1934;1965                         | 1199                                        | 623                              |
| carbetocin    | fomepizole       | 5                          | OXTR                                                        | ADH1C;ADH1A;ADH1B                                           | 1199                                        | 256;908;947                                 | 843                              |
| clomethiazole | paclitaxel       | 4                          | GABRA3;GABRA4;GABRA2;GABRG2;GABRA5;GABRD;GABRQ;GABRE;GABRG1 | TUBA1C;TUBB4A;TUBB2B;TUBA3C;TUBA3E;TUBB3                    | 802;1023;1081;1388;1586;1749;1934;1965;2474 | 350;1269;1403;1837;2106;2304                | 1128                             |
| carbetocin    | tranylcypromine  | 4                          | OXTR                                                        | MAOA                                                        | 1199                                        | 969                                         | 565                              |
| fomepizole    | paclitaxel       | 4                          | ADH1C;ADH1A;ADH1B                                           | TUBA1C;TUBB4A;TUBB2B;TUBA3C;TUBA3E;TUBB3                    | 256;908;947                                 | 350;1269;1403;1837;2106;2304                | 1137                             |
| methimazole   | paclitaxel       | 4                          | TPO                                                         | TUBA1C;TUBB4A;TUBB2B;TUBA3C;TUBA3E;TUBB3                    | 906                                         | 350;1269;1403;1837;2106;2304                | 889                              |
| paclitaxel    | propylthiouracil | 4                          | TUBA1C;TUBB4A;TUBB2B;TUBA3C;TUBA3E;TUBB3                    | TPO;DIO1                                                    | 350;1269;1403;1837;2106;2304                | 906;1755                                    | 919                              |
| carbetocin    | clomethiazole    | 4                          | OXTR                                                        | GABRA3;GABRA4;GABRA2;GABRG2;GABRA5;GABRD;GABRQ;GABRE;GABRG1 | 1199                                        | 802;1023;1081;1388;1586;1749;1934;1965;2474 | 766                              |
| carbetocin    | carbimazole      | 3                          | OXTR                                                        | TPO                                                         | 1199                                        | 906                                         | 436                              |
| amantadine    | carbetocin       | 3                          | GRIN2D;GRIN2B                                               | OXTR                                                        | 386;1486                                    | 1199                                        | 632                              |
| gaboxadol     | paclitaxel       | 3                          | GABRA3;GABRA2;GABRA5;GABRA4                                 | TUBA1C;TUBB4A;TUBB2B;TUBA3C;TUBA3E;TUBB3                    | 1081;1586;1934;1965                         | 350;1269;1403;1837;2106;2304                | 1007                             |
| carbetocin    | nicotine         | 3                          | OXTR                                                        | CHRNA4                                                      | 1199                                        | 2417                                        | 256                              |
| carbetocin    | phenelzine       | 3                          | OXTR                                                        | MAOA                                                        | 1199                                        | 969                                         | 565                              |

|               |                  |   |                                          |                                                   |                              |                                                      |      |
|---------------|------------------|---|------------------------------------------|---------------------------------------------------|------------------------------|------------------------------------------------------|------|
| paclitaxel    | tranylcypromine  | 2 | TUBA1C;TUBB4A;TUBB2B;TUBA3C;TUBA3E;TUBB3 | MAOA                                              | 350;1269;1403;1837;2106;2304 | 969                                                  | 946  |
| methimazole   | vincristine      | 2 | TPO                                      | TUBB3;TUBA3E;TUBA3C;TUBB2B;TUBB4A;TUBA1C          | 906                          | 350;1269;1403;1837;2106;2304                         | 889  |
| carbetocin    | pargyline        | 2 | OXTR                                     | MAOA                                              | 1199                         | 969                                                  | 565  |
| fomepizole    | vinblastine      | 2 | ADH1C;ADH1A;ADH1B                        | TUBA3C;TUBB4A;TUBA3E;TUBA1C;TUBB2B;TUBB3          | 256;908;947                  | 350;1269;1403;1837;2106;2304                         | 1137 |
| methimazole   | vinblastine      | 2 | TPO                                      | TUBA3C;TUBB4A;TUBA3E;TUBA1C;TUBB2B;TUBB3          | 906                          | 350;1269;1403;1837;2106;2304                         | 889  |
| fomepizole    | vincristine      | 2 | ADH1C;ADH1A;ADH1B                        | TUBB3;TUBA3E;TUBA3C;TUBB2B;TUBB4A;TUBA1C          | 256;908;947                  | 350;1269;1403;1837;2106;2304                         | 1137 |
| fomepizole    | docetaxel        | 2 | ADH1C;ADH1A;ADH1B                        | TUBA1C;TUBB2B;TUBA3E;TUBB4A;TUBA3C;TUBB3          | 256;908;947                  | 350;1269;1403;1837;2106;2304                         | 1137 |
| methimazole   | docetaxel        | 2 | TPO                                      | TUBA1C;TUBB2B;TUBA3E;TUBB4A;TUBA3C;TUBB3          | 906                          | 350;1269;1403;1837;2106;2304                         | 889  |
| levetiracetam | carbetocin       | 1 | CACNA1B                                  | OXTR                                              | 1627                         | 1199                                                 | 298  |
| carbetocin    | propylthiouracil | 1 | OXTR                                     | TPO;DIO1                                          | 1199                         | 906;1755                                             | 472  |
| paclitaxel    | phenelzine       | 1 | TUBA1C;TUBB4A;TUBB2B;TUBA3C;TUBA3E;TUBB3 | MAOA                                              | 350;1269;1403;1837;2106;2304 | 969                                                  | 946  |
| carbimazole   | paclitaxel       | 1 | TPO                                      | TUBA1C;TUBB4A;TUBB2B;TUBA3C;TUBA3E;TUBB3          | 906                          | 350;1269;1403;1837;2106;2304                         | 889  |
| levetiracetam | paclitaxel       | 1 | CACNA1B                                  | TUBA1C;TUBB4A;TUBB2B;TUBA3C;TUBA3E;TUBB3          | 1627                         | 350;1269;1403;1837;2106;2304                         | 736  |
| fluorouracil  | paclitaxel       | 1 | TYMS                                     | TUBA1C;TUBB4A;TUBB2B;TUBA3C;TUBA3E;TUBB3          | 1385                         | 350;1269;1403;1837;2106;2304                         | 787  |
| pramipexole   | paclitaxel       | 1 | DRD2                                     | TUBA1C;TUBB4A;TUBB2B;TUBA3C;TUBA3E;TUBB3          | 1221                         | 350;1269;1403;1837;2106;2304                         | 878  |
| pargyline     | paclitaxel       | 1 | MAOA                                     | TUBA1C;TUBB4A;TUBB2B;TUBA3C;TUBA3E;TUBB3          | 969                          | 350;1269;1403;1837;2106;2304                         | 946  |
| carbetocin    | acamprosate      | 1 | OXTR                                     | GABRD;GABRQ;GRIN2B;GABRE;GABRA2;GRIN2D;GABRA3;GAB | 1199                         | 386;802;1023;1081;1388;1486;1586;1749;1934;1965;2474 | 938  |

|  |  |  |  |                          |  |  |  |
|--|--|--|--|--------------------------|--|--|--|
|  |  |  |  | RA5;GABRA4;GABRG1;GABRG2 |  |  |  |
|--|--|--|--|--------------------------|--|--|--|

**Table S4** - Results of the pipeline for liver hepatocellular carcinoma (LIHC). In each row are indicated the drugs in the combination, the frequency of occurrence in the output of the genetic algorithm, their targets, the respective disease network rank and the area of action in terms of number of genes.

| Drug 1             | Drug 2       | Drug 3       | Occurrence in GA solutions | Target genes 1 | Target genes 2 | Target genes 3 | LIHC network rank 1 | LIHC network rank 2 | LIHC network rank 3 | Estimated area of action (nodes) |
|--------------------|--------------|--------------|----------------------------|----------------|----------------|----------------|---------------------|---------------------|---------------------|----------------------------------|
| estrone            | tanespimycin | NA           | 10                         | ESR1           | HSP90AB1       |                | 203                 | 175                 |                     | 875                              |
| diethylstilbestrol | tanespimycin | NA           | 10                         | ESR1           | HSP90AB1       |                | 203                 | 175                 |                     | 875                              |
| tanespimycin       | tozasertib   | estradiol    | 10                         | HSP90AB1       | AURKA;AURKB    | ESR1           | 175                 | 61;305              | 203                 | 1055                             |
| estrone            | tozasertib   | tanespimycin | 10                         | ESR1           | AURKA;AURKB    | HSP90AB1       | 203                 | 61;305              | 175                 | 1055                             |
| tozasertib         | tanespimycin | NA           | 10                         | AURKA;AURKB    | HSP90AB1       |                | 61;305              | 175                 |                     | 897                              |
| tanespimycin       | dasatinib    | estradiol    | 10                         | HSP90AB1       | EPHA2;PDGFRB   | ESR1           | 175                 | 1092;1113           | 203                 | 1006                             |
| diethylstilbestrol | fulvestrant  | tanespimycin | 10                         | ESR1           | ESR1           | HSP90AB1       | 203                 | 203                 | 175                 | 875                              |
| toremifene         | tanespimycin | NA           | 10                         | ESR1           | HSP90AB1       |                | 203                 | 175                 |                     | 875                              |
| tozasertib         | fulvestrant  | tanespimycin | 10                         | AURKA;AURKB    | ESR1           | HSP90AB1       | 61;305              | 203                 | 175                 | 1055                             |

**Table S5** - Results of the pipeline for prostate adenocarcinoma (PRAD). In each row are indicated the drugs in the combination, the frequency of occurrence in the output of the genetic algorithm, their targets, the respective disease network rank and the area of action in terms of number of genes.

| Drug 1     | Drug 2      | Occurrence in GA solutions | Target genes 1 | Target genes 2                    | PRAD network rank 1 | PRAD network rank 2  | Estimated area of action (nodes) |
|------------|-------------|----------------------------|----------------|-----------------------------------|---------------------|----------------------|----------------------------------|
| fomepizole | vinblastine | 8                          | ADH1B          | TUBA1A;TUBB4A;TUBA4A;TUBB2A;TUBB6 | 796                 | 58;703;781;1294;1722 | 791                              |

|               |                  |   |                                           |                                                     |                          |                               |     |
|---------------|------------------|---|-------------------------------------------|-----------------------------------------------------|--------------------------|-------------------------------|-----|
| methimazole   | paclitaxel       | 7 | TPO                                       | TUBA1A;TUBB6;<br>TUBB2A;TUBB4<br>A;TUBA4A           | 818                      | 58;703;781;129<br>4;1722      | 740 |
| paclitaxel    | guanethidine     | 7 | TUBA1A;TUBB6;<br>TUBB2A;TUBB4<br>A;TUBA4A | SLC6A2                                              | 58;703;781;129<br>4;1722 | 1606                          | 740 |
| gaboxadol     | paclitaxel       | 7 | GABRA1;GABRB<br>3                         | TUBA1A;TUBB6;<br>TUBB2A;TUBB4<br>A;TUBA4A           | 1352;1927                | 58;703;781;129<br>4;1722      | 767 |
| clomethiazole | paclitaxel       | 6 | GABRA1;GABRB<br>3                         | TUBA1A;TUBB6;<br>TUBB2A;TUBB4<br>A;TUBA4A           | 1352;1927                | 58;703;781;129<br>4;1722      | 767 |
| carbimazole   | paclitaxel       | 5 | TPO                                       | TUBA1A;TUBB6;<br>TUBB2A;TUBB4<br>A;TUBA4A           | 818                      | 58;703;781;129<br>4;1722      | 740 |
| paclitaxel    | tranylcypromine  | 5 | TUBA1A;TUBB6;<br>TUBB2A;TUBB4<br>A;TUBA4A | MAOB                                                | 58;703;781;129<br>4;1722 | 923                           | 766 |
| pargyline     | paclitaxel       | 5 | MAOB                                      | TUBA1A;TUBB6;<br>TUBB2A;TUBB4<br>A;TUBA4A           | 923                      | 58;703;781;129<br>4;1722      | 766 |
| tolazoline    | paclitaxel       | 4 | ADRA2B;ADRA1<br>B;ADRA1D;ADR<br>A1A       | TUBA1A;TUBB6;<br>TUBB2A;TUBB4<br>A;TUBA4A           | 692;741;1036;1<br>393    | 58;703;781;129<br>4;1722      | 853 |
| paclitaxel    | phenelzine       | 4 | TUBA1A;TUBB6;<br>TUBB2A;TUBB4<br>A;TUBA4A | MAOB                                                | 58;703;781;129<br>4;1722 | 923                           | 766 |
| fomepizole    | vincristine      | 4 | ADH1B                                     | TUBA4A;TUBB4<br>A;TUBB2A;TUBA<br>1A;TUBB6           | 796                      | 58;703;781;129<br>4;1722      | 791 |
| paclitaxel    | mercaptopurine   | 4 | TUBA1A;TUBB6;<br>TUBB2A;TUBB4<br>A;TUBA4A | PPAT                                                | 58;703;781;129<br>4;1722 | 870                           | 724 |
| methimazole   | vinblastine      | 4 | TPO                                       | TUBA1A;TUBB4<br>A;TUBA4A;TUBB<br>2A;TUBB6           | 818                      | 58;703;781;129<br>4;1722      | 740 |
| paclitaxel    | propylthiouracil | 3 | TUBA1A;TUBB6;<br>TUBB2A;TUBB4<br>A;TUBA4A | TPO;DIO1                                            | 58;703;781;129<br>4;1722 | 818;1832                      | 749 |
| pramipexole   | paclitaxel       | 3 | DRD2                                      | TUBA1A;TUBB6;<br>TUBB2A;TUBB4<br>A;TUBA4A           | 834                      | 58;703;781;129<br>4;1722      | 772 |
| paclitaxel    | dopamine         | 2 | TUBA1A;TUBB6;<br>TUBB2A;TUBB4<br>A;TUBA4A | ADRB1                                               | 58;703;781;129<br>4;1722 | 250                           | 786 |
| paclitaxel    | gabapentin       | 2 | TUBA1A;TUBB6;<br>TUBB2A;TUBB4<br>A;TUBA4A | CACNB1;CACNA<br>2D3;CACNA1D                         | 58;703;781;129<br>4;1722 | 387;973;980                   | 913 |
| paclitaxel    | mephentermine    | 2 | TUBA1A;TUBB6;<br>TUBB2A;TUBB4<br>A;TUBA4A | ADRA2B;ADRA1<br>B;ADRA1D;ADR<br>A1A;ADRB1;ADR<br>B3 | 58;703;781;129<br>4;1722 | 250;692;741;96<br>5;1036;1393 | 926 |
| paclitaxel    | mexiletine       | 2 | TUBA1A;TUBB6;<br>TUBB2A;TUBB4<br>A;TUBA4A | SCN5A;SCN1A;S<br>CN11A                              | 58;703;781;129<br>4;1722 | 361;1756;2045                 | 915 |
| amantadine    | paclitaxel       | 1 | GRIN3A                                    | TUBA1A;TUBB6;<br>TUBB2A;TUBB4                       | 1799                     | 58;703;781;129<br>4;1722      | 729 |

|                 |                  |   |                                   |                                   |                      |                      |     |
|-----------------|------------------|---|-----------------------------------|-----------------------------------|----------------------|----------------------|-----|
|                 |                  |   |                                   | A;TUBA4A                          |                      |                      |     |
| pseudoephedrine | paclitaxel       | 1 | SLC6A2                            | TUBA1A;TUBB6;TUBB2A;TUBB4A;TUBA4A | 1606                 | 58;703;781;1294;1722 | 740 |
| gaboxadol       | vincristine      | 1 | GABRA1;GABRB3                     | TUBA4A;TUBB4A;TUBB2A;TUBA1A;TUBB6 | 1352;1927            | 58;703;781;1294;1722 | 767 |
| paclitaxel      | tetrahydrozoline | 1 | TUBA1A;TUBB6;TUBB2A;TUBB4A;TUBA4A | ADRA1D;ADRA1B;ADRA2B;ADRA1A       | 58;703;781;1294;1722 | 692;741;1036;1393    | 853 |
| paclitaxel      | acetazolamide    | 1 | TUBA1A;TUBB6;TUBB2A;TUBB4A;TUBA4A | CA4;CA12;CA2                      | 58;703;781;1294;1722 | 1505;1536;1611       | 864 |
| methimazole     | vincristine      | 1 | TPO                               | TUBA4A;TUBB4A;TUBB2A;TUBA1A;TUBB6 | 818                  | 58;703;781;1294;1722 | 740 |
| paclitaxel      | nicotine         | 1 | TUBA1A;TUBB6;TUBB2A;TUBB4A;TUBA4A | CHRNA4                            | 58;703;781;1294;1722 | 1597                 | 768 |

**Table S6** - Results of the pipeline for colon adenocarcinoma (COAD). In each row are indicated the drugs in the combination, the frequency of occurrence in the output of the genetic algorithm, their targets, the respective disease network rank and the area of action in terms of number of genes.

| Drug 1     | Drug 2        | Occurrence in GA solutions | Target genes 1 | Target genes 2                         | COAD network rank 1 | COAD network rank 2         | Estimated area of action (nodes) |
|------------|---------------|----------------------------|----------------|----------------------------------------|---------------------|-----------------------------|----------------------------------|
| clonidine  | navitoclax    | 10                         | ADRA2C         | BCL2                                   | 1603                | 466                         | 633                              |
| navitoclax | pentobarbital | 10                         | BCL2           | GABRA6;GABRP;GABRE;GABRG1;GABRD;GABRG2 | 466                 | 881;993;1135;1253;1951;2211 | 952                              |
| navitoclax | imiquimod     | 10                         | BCL2           | TLR7                                   | 466                 | 582                         | 764                              |
| navitoclax | minoxidil     | 10                         | BCL2           | KCNJ11                                 | 466                 | 1782                        | 650                              |
| navitoclax | ibuprofen     | 10                         | BCL2           | PTGS1                                  | 466                 | 1447                        | 707                              |
| navitoclax | perhexiline   | 10                         | BCL2           | CPT2                                   | 466                 | 129                         | 656                              |
| navitoclax | zonisamide    | 10                         | BCL2           | SCN9A;SCN11A;SCN7A;SCN3A               | 466                 | 13;281;710;1403             | 1015                             |
| navitoclax | amiloride     | 10                         | BCL2           | SCNN1B;SCNN1G                          | 466                 | 522;1566                    | 831                              |
| navitoclax | azathioprine  | 9                          | BCL2           | PPAT                                   | 466                 | 138                         | 606                              |
| navitoclax | minaprine     | 1                          | BCL2           | DRD2;MAOA                              | 466                 | 133;1818                    | 855                              |

**Table S7** - Results of the pipeline for lung squamous cell carcinoma (LUSC). In each row are indicated the drugs in the combination, the frequency of occurrence in the output of the genetic algorithm, their targets, the respective disease network rank and the area of action in terms of number of genes.

| Drug 1          | Drug 2          | Occurrence in GA solutions | Target genes 1                          | Target genes 2                          | LUSC network rank 1           | LUSC network rank 2           | Estimated area of action (nodes) |
|-----------------|-----------------|----------------------------|-----------------------------------------|-----------------------------------------|-------------------------------|-------------------------------|----------------------------------|
| paclitaxel      | riluzole        | 10                         | TUBB1;TUBB4A;TUBB2B;TUBA3C;TUBA3E;TUBB3 | SCN5A;SCN7A;SCN1A;SCN8A                 | 1154;1242;1786;1974;2559;2591 | 357;682;1181;1725             | 1563                             |
| paclitaxel      | lidocaine       | 10                         | TUBB1;TUBB4A;TUBB2B;TUBA3C;TUBA3E;TUBB3 | SCN8A;SCN5A;SCN1A;SCN7A                 | 1154;1242;1786;1974;2559;2591 | 357;682;1181;1725             | 1563                             |
| tranylcypromine | docetaxel       | 9                          | MAOB                                    | TUBB2B;TUBA3E;TUBB4A;TUBB1;TUBA3C;TUBB3 | 1101                          | 1154;1242;1786;1974;2559;2591 | 1172                             |
| paclitaxel      | tocainide       | 9                          | TUBB1;TUBB4A;TUBB2B;TUBA3C;TUBA3E;TUBB3 | SCN5A;SCN1A;SCN7A;SCN8A                 | 1154;1242;1786;1974;2559;2591 | 357;682;1181;1725             | 1563                             |
| paclitaxel      | doxepin         | 9                          | TUBB1;TUBB4A;TUBB2B;TUBA3C;TUBA3E;TUBB3 | SLC6A2                                  | 1154;1242;1786;1974;2559;2591 | 1841                          | 1101                             |
| vinorelbine     | tranylcypromine | 8                          | TUBB2B;TUBB1;TUBB4A;TUBA3C;TUBB3;TUBA3E | MAOB                                    | 1154;1242;1786;1974;2559;2591 | 1101                          | 1172                             |
| tranylcypromine | vinblastine     | 7                          | MAOB                                    | TUBA3C;TUBB4A;TUBA3E;TUBB1;TUBB2B;TUBB3 | 1101                          | 1154;1242;1786;1974;2559;2591 | 1172                             |
| paclitaxel      | lamotrigine     | 7                          | TUBB1;TUBB4A;TUBB2B;TUBA3C;TUBA3E;TUBB3 | SCN7A;SCN5A;SCN1A;SCN8A                 | 1154;1242;1786;1974;2559;2591 | 357;682;1181;1725             | 1563                             |
| paclitaxel      | duloxetine      | 6                          | TUBB1;TUBB4A;TUBB2B;TUBA3C;TUBA3E;TUBB3 | SLC6A2;SLC6A4                           | 1154;1242;1786;1974;2559;2591 | 1417;1841                     | 1279                             |
| tranylcypromine | vincristine     | 6                          | MAOB                                    | TUBB3;TUBB1;TUBA3E;TUBA3C;TUBB2B;TUBB4A | 1101                          | 1154;1242;1786;1974;2559;2591 | 1172                             |
| fluvoxamine     | paclitaxel      | 5                          | SLC6A4                                  | TUBB1;TUBB4A;TUBB2B;TUBA3C;TUBA3E;TUBB3 | 1417                          | 1154;1242;1786;1974;2559;2591 | 1190                             |
| vincristine     | riluzole        | 2                          | TUBB3;TUBB1;TUBA3E;TUBA3C;TUBB2B;TUBB4A | SCN5A;SCN7A;SCN1A;SCN8A                 | 1154;1242;1786;1974;2559;2591 | 357;682;1181;1725             | 1563                             |
| paclitaxel      | betaxolol       | 1                          | TUBB1;TUBB4A;                           | ADRB1                                   | 1154;1242;1786                | 1312                          | 1192                             |



|            |             |   |                                         |       |                               |      |      |
|------------|-------------|---|-----------------------------------------|-------|-------------------------------|------|------|
|            |             |   | TUBB2B;TUBA3C;TUBA3E;TUBB3              |       | ;1974;2559;2591               |      |      |
| paclitaxel | mirtazapine | 1 | TUBB1;TUBB4A;TUBB2B;TUBA3C;TUBA3E;TUBB3 | HTR2C | 1154;1242;1786;1974;2559;2591 | 1197 | 1203 |

**Table S8** – Drugs considered in the analysis of the cancer types included in the case study. The cancer cell lines from which the drug sensitivity profiles have been derived are: MCF7 for BRCA, HEPG2 for LIHC, PC3 for PRAD, HT29 for COAD and A549 for LUSC.

| Drugs             | BRCA | COAD | LIHC | LUSC | PRAD |
|-------------------|------|------|------|------|------|
| acamprosate       | x    |      |      |      |      |
| acetazolamide     | x    |      |      |      | x    |
| acitretin         | x    |      |      |      | x    |
| afatinib          | x    | x    |      | x    |      |
| alectinib         | x    | x    |      |      |      |
| alfuzosin         | x    |      |      | x    | x    |
| alisertib         | x    |      |      |      | x    |
| alitretinoin      | x    |      |      | x    | x    |
| alvocidib         | x    |      |      | x    |      |
| amantadine        | x    |      |      |      | x    |
| ambrisentan       | x    |      |      |      | x    |
| aminoglutethimide | x    |      |      |      | x    |
| amisulpride       | x    |      |      | x    | x    |
| amitriptyline     | x    |      |      |      | x    |
| amlodipine        | x    |      |      | x    | x    |
| amoxapine         | x    |      |      |      | x    |
| amsacrine         | x    |      |      |      | x    |
| amuvatinib        | x    | x    |      |      | x    |
| anagrelide        | x    |      |      |      | x    |
| aprepitant        | x    |      |      |      |      |
| aripiprazole      | x    |      |      |      | x    |
| articaïne         | x    |      |      |      | x    |
| asenapine         | x    |      |      |      | x    |
| balsalazide       | x    |      |      |      | x    |

|                             |   |   |  |   |   |
|-----------------------------|---|---|--|---|---|
| beclomethasone-dipropionate | x |   |  |   |   |
| benperidol                  | x |   |  |   | x |
| benzbromarone               | x | x |  |   |   |
| bepidil                     | x |   |  |   | x |
| betahistine                 | x |   |  |   |   |
| betamethasone-acetate       | x |   |  |   |   |
| betamethasone               | x |   |  |   |   |
| bezafibrate                 | x |   |  |   |   |
| bimatoprost                 | x |   |  |   |   |
| bosentan                    | x |   |  |   | x |
| brimonidine                 | x |   |  |   | x |
| brivanib                    | x | x |  | x | x |
| bromocriptine               | x | x |  |   | x |
| budesonide                  | x | x |  |   |   |
| bumetanide                  | x |   |  |   |   |
| buparlisib                  | x | x |  |   |   |
| bupivacaine                 | x |   |  |   |   |
| cabergoline                 | x |   |  |   | x |
| cabozantinib                | x | x |  | x |   |
| canertinib                  | x | x |  | x |   |
| capecitabine                | x |   |  |   |   |
| carbamazepine               | x |   |  |   | x |
| carbenoxolone               | x |   |  |   |   |
| carbetocin                  | x |   |  |   |   |
| carbimazole                 | x |   |  |   | x |
| carteolol                   | x |   |  |   | x |
| carvedilol                  | x |   |  |   | x |
| cediranib                   | x |   |  |   | x |
| chlorpromazine              | x |   |  |   | x |
| chlorprothixene             | x |   |  |   | x |
| cilastatin                  | x |   |  |   |   |
| cinnarizine                 | x |   |  |   | x |
| ciprofibrate                | x |   |  |   |   |
| citalopram                  | x |   |  | x |   |
| clebopride                  | x |   |  |   | x |
| clenbuterol                 | x |   |  |   |   |

|                       |   |   |   |   |   |
|-----------------------|---|---|---|---|---|
| clofarabine           | x |   |   |   | x |
| clofibrate            | x |   |   |   |   |
| clomethiazole         | x |   |   |   | x |
| clomipramine          | x |   |   |   |   |
| clonidine             | x | x |   |   | x |
| clozapine             | x |   |   |   | x |
| colchicine            | x |   |   |   | x |
| cortisone-acetate     | x |   |   |   |   |
| crizotinib            | x | x |   |   |   |
| cyclobenzaprine       | x |   |   |   |   |
| cytarabine            | x |   |   |   |   |
| dacomitinib           | x | x |   |   | x |
| dantrolene            | x |   |   |   | x |
| danusertib            | x |   |   |   | x |
| dasatinib             | x | x | x | x | x |
| daunorubicin          | x |   |   | x | x |
| desoximetasone        | x |   |   |   |   |
| dexamethasone-acetate | x |   |   |   |   |
| dexamethasone         | x | x |   |   |   |
| dexfenfluramine       | x |   |   |   | x |
| diazepam              | x |   |   |   | x |
| digitoxin             | x |   |   |   | x |
| digoxin               | x |   |   |   | x |
| dihydroergotamine     | x | x |   |   |   |
| diltiazem             | x |   |   | x | x |
| dinaciclib            | x |   |   |   |   |
| dinoprostone          | x |   |   |   |   |
| dipyridamole          | x |   |   |   | x |
| disopyramide          | x |   |   |   | x |
| disulfiram            | x |   |   |   | x |
| dobutamine            | x |   |   |   | x |
| docetaxel             | x |   |   | x | x |
| dovitinib             | x |   |   | x | x |
| doxapram              | x |   |   |   | x |
| doxazosin             | x |   |   |   | x |
| doxorubicin           | x |   |   | x | x |

|                         |   |   |   |   |   |
|-------------------------|---|---|---|---|---|
| doxycycline             | x |   |   |   |   |
| droperidol              | x |   |   |   | x |
| duloxetine              | x |   |   | x | x |
| eplerenone              | x |   |   |   |   |
| erlotinib               | x |   |   |   |   |
| escitalopram            | x |   |   | x |   |
| esmolol                 | x |   |   |   | x |
| ethotoin                | x |   |   |   | x |
| etomidate               | x |   |   |   | x |
| etoposide               | x |   |   | x | x |
| felbamate               | x |   |   | x | x |
| felodipine              | x |   |   |   | x |
| fenofibrate             | x |   |   |   |   |
| fenoterol               | x |   |   |   |   |
| flavoxate               | x |   |   |   | x |
| flecainide              | x |   |   |   | x |
| floxuridine             | x |   |   |   |   |
| fludrocortisone-acetate | x |   |   |   |   |
| flumazenil              | x |   |   | x | x |
| flunisolide             | x |   |   |   |   |
| fluocinolone-acetonide  | x | x |   |   |   |
| fluocinonide            | x |   |   |   |   |
| fluorometholone         | x | x |   |   |   |
| fluorouracil            | x |   |   |   |   |
| fluoxetine              | x |   |   | x |   |
| fluphenazine            | x | x |   |   | x |
| fluticasone-propionate  | x |   |   |   |   |
| fluvoxamine             | x |   |   | x |   |
| fomepizole              | x |   |   |   | x |
| foretinib               | x | x |   |   | x |
| formoterol              | x |   |   |   |   |
| fulvestrant             | x |   | x |   |   |
| furosemide              | x |   |   |   |   |
| gabapentin              | x |   |   |   | x |
| gaboxadol               | x |   |   |   | x |
| gefitinib               | x |   |   |   |   |

|                              |   |   |  |   |   |
|------------------------------|---|---|--|---|---|
| gemcitabine                  | x |   |  |   | x |
| gemfibrozil                  | x |   |  |   |   |
| guanabenz                    | x |   |  |   | x |
| guanfacine                   | x |   |  |   | x |
| haloperidol                  | x | x |  |   | x |
| hydrocortisone-hemisuccinate | x |   |  |   |   |
| hydrocortisone-valerate      | x |   |  |   |   |
| hydrocortisone               | x |   |  |   |   |
| idarubicin                   | x |   |  | x |   |
| imatinib                     | x | x |  |   | x |
| imipramine                   | x |   |  |   | x |
| isocarboxazid                | x |   |  |   | x |
| isradipine                   | x |   |  | x | x |
| labetalol                    | x |   |  |   | x |
| lamotrigine                  | x |   |  | x | x |
| lapatinib                    | x |   |  |   |   |
| latanoprost                  | x |   |  |   |   |
| lestaurtinib                 | x |   |  |   |   |
| levetiracetam                | x |   |  |   |   |
| levobunolol                  | x |   |  |   | x |
| levomepromazine              | x |   |  |   | x |
| levothyroxine                | x |   |  |   |   |
| lidocaine                    | x |   |  | x | x |
| linifanib                    | x |   |  | x |   |
| lithyronine                  | x |   |  |   |   |
| lorazepam                    | x |   |  |   | x |
| loxapine                     | x |   |  | x | x |
| masitinib                    | x | x |  |   | x |
| mecamylamine                 | x |   |  |   |   |
| medrysone                    | x |   |  |   |   |
| memantine                    | x |   |  |   | x |
| mephentermine                | x |   |  |   | x |
| mephenytoin                  | x |   |  |   | x |
| mepivacaine                  | x |   |  |   | x |
| mesoridazine                 | x |   |  |   | x |
| methazolamide                | x |   |  |   | x |

|                    |   |   |   |   |   |
|--------------------|---|---|---|---|---|
| methimazole        | x |   |   |   | x |
| methyl dopa        | x |   |   |   | x |
| methylprednisolone | x |   |   |   |   |
| methysergide       | x |   |   | x |   |
| metoclopramide     | x |   |   |   | x |
| mexiletine         | x |   |   |   | x |
| mibefradil         | x |   |   |   |   |
| midodrine          | x |   |   |   | x |
| midostaurin        | x |   |   |   | x |
| mifepristone       | x |   |   |   | x |
| milnacipran        | x |   |   |   | x |
| minaprine          | x | x |   |   | x |
| minoxidil          | x | x |   |   |   |
| mirtazapine        | x |   |   | x | x |
| mitotane           | x |   |   |   | x |
| mitoxantrone       | x |   | x | x | x |
| molindone          | x | x |   |   | x |
| motesanib          | x |   |   | x | x |
| moxisylyte         | x |   |   |   | x |
| nadolol            | x |   |   |   | x |
| nalbuphine         | x |   |   |   |   |
| naloxone           | x |   |   |   |   |
| naltrexone         | x |   |   |   |   |
| naphazoline        | x |   |   |   | x |
| nefazodone         | x |   |   | x | x |
| neratinib          | x | x |   | x | x |
| nialamide          | x |   |   |   | x |
| nicardipine        | x |   |   | x | x |
| nicotine           | x |   |   |   | x |
| nifedipine         | x |   |   | x | x |
| nimodipine         | x | x |   | x | x |
| nintedanib         | x | x |   |   | x |
| nisoldipine        | x |   |   |   | x |
| nomifensine        | x |   |   |   | x |
| norepinephrine     | x |   |   |   | x |
| nortriptyline      | x |   |   |   | x |

|                      |   |   |  |   |   |
|----------------------|---|---|--|---|---|
| olanzapine           | x |   |  |   | x |
| olaparib             | x |   |  |   | x |
| orantinib            | x |   |  |   | x |
| orlistat             | x |   |  |   | x |
| orphenadrine         | x |   |  |   | x |
| osimertinib          | x | x |  | x |   |
| oxcarbazepine        | x |   |  |   | x |
| oxprenolol           | x |   |  |   | x |
| oxymetazoline        | x |   |  |   | x |
| paclitaxel           | x |   |  | x | x |
| pargyline            | x |   |  |   | x |
| paroxetine           | x |   |  | x |   |
| pazopanib            | x | x |  | x | x |
| pelitinib            | x |   |  |   |   |
| pentobarbital        | x | x |  |   | x |
| pentoxifylline       | x |   |  |   | x |
| pergolide            | x |   |  |   | x |
| perphenazine         | x |   |  |   | x |
| phenazopyridine      | x |   |  |   | x |
| phenelzine           | x |   |  |   | x |
| phenoxybenzamine     | x |   |  |   | x |
| phensuximide         | x |   |  |   |   |
| phentolamine         | x |   |  |   | x |
| phenytoin            | x |   |  |   | x |
| pimozide             | x | x |  |   | x |
| pinacidil            | x |   |  |   |   |
| pindolol             | x |   |  |   | x |
| pioglitazone         | x |   |  |   |   |
| pramipexole          | x |   |  |   | x |
| prazosin             | x |   |  |   | x |
| prednisolone-acetate | x |   |  |   |   |
| prednisolone         | x |   |  |   |   |
| prednisone           | x |   |  |   |   |
| prilocaine           | x |   |  |   | x |
| primidone            | x |   |  |   | x |
| procainamide         | x |   |  |   | x |

|                  |   |   |  |   |   |
|------------------|---|---|--|---|---|
| prochlorperazine | x |   |  |   | x |
| proglumide       | x |   |  |   | x |
| promazine        | x |   |  |   | x |
| propafenone      | x |   |  |   | x |
| propofol         | x |   |  |   | x |
| propranolol      | x |   |  |   | x |
| propylthiouracil | x |   |  |   | x |
| protriptyline    | x |   |  |   | x |
| quetiapine       | x |   |  |   | x |
| quinidine        | x |   |  | x | x |
| quizartinib      | x | x |  | x | x |
| raloxifene       | x |   |  |   |   |
| raltitrexed      | x |   |  | x |   |
| ranolazine       | x |   |  | x | x |
| regorafenib      | x | x |  | x | x |
| riluzole         | x |   |  | x | x |
| rimexolone       | x |   |  |   |   |
| risperidone      | x |   |  | x | x |
| ritodrine        | x | x |  | x |   |
| rivaroxaban      | x |   |  |   |   |
| rizatriptan      | x |   |  |   |   |
| ropinirole       | x |   |  |   | x |
| rosiglitazone    | x |   |  |   |   |
| rucaparib        | x |   |  |   | x |
| salmeterol       | x |   |  | x |   |
| semaxanib        | x |   |  |   | x |
| sertindole       | x |   |  |   | x |
| sertraline       | x |   |  | x |   |
| sibutramine      | x |   |  | x | x |
| sorafenib        | x | x |  | x | x |
| sotalol          | x | x |  | x | x |
| spironolactone   | x |   |  |   |   |
| sulfinpyrazone   | x |   |  |   |   |
| suloctidil       | x |   |  |   | x |
| sumatriptan      | x |   |  |   |   |
| sunitinib        | x |   |  | x | x |



|                         |   |   |   |   |   |
|-------------------------|---|---|---|---|---|
| tandutinib              | x |   |   |   | x |
| teniposide              | x |   |   |   | x |
| terazosin               | x |   |   |   | x |
| terbutaline             | x |   |   |   |   |
| tetracaine              | x |   |   |   | x |
| tetrahydrozoline        | x |   |   |   | x |
| theophylline            | x |   |   |   | x |
| thioridazine            | x | x |   | x | x |
| thiothixene             | x |   |   |   | x |
| ticlopidine             | x |   |   |   |   |
| timolol                 | x |   |   |   | x |
| tivantinib              | x | x |   |   |   |
| tizanidine              | x |   |   |   | x |
| tocainide               | x |   |   | x | x |
| tolazoline              | x |   |   |   | x |
| topiramate              | x |   |   |   | x |
| toremifene              | x |   | x |   |   |
| tosedostat              | x |   |   |   |   |
| tozasertib              | x |   | x | x | x |
| tranlycypromine         | x | x |   | x | x |
| trazodone               | x |   |   | x |   |
| triamcinolone-acetonide | x | x |   |   |   |
| triamcinolone           | x | x |   |   |   |
| trifluoperazine         | x | x |   | x | x |
| triflupromazine         | x |   |   |   | x |
| trimipramine            | x |   |   |   | x |
| troglitazone            | x |   |   |   |   |
| vandetanib              | x | x |   | x | x |
| varenicline             | x |   |   |   | x |
| veliparib               | x |   |   |   | x |
| venlafaxine             | x |   |   |   | x |
| verapamil               | x |   |   | x | x |
| vinblastine             | x |   |   | x | x |
| vincristine             | x |   |   | x | x |
| vinorelbine             | x |   |   | x | x |
| zaleplon                | x |   |   |   | x |

|                    |   |   |   |   |   |
|--------------------|---|---|---|---|---|
| ziprasidone        | x |   |   |   | x |
| zolmitriptan       | x |   |   |   |   |
| zolpidem           | x |   |   |   | x |
| zonisamide         | x | x |   |   | x |
| amiloride          |   | x |   |   |   |
| azathioprine       |   | x |   |   | x |
| cisapride          |   | x |   |   |   |
| enzastaurin        |   | x |   |   | x |
| ibuprofen          |   | x |   |   | x |
| imiquimod          |   | x |   |   |   |
| indoprofen         |   | x |   |   | x |
| letrozole          |   | x |   |   | x |
| navitoclax         |   | x |   |   |   |
| norethindrone      |   | x |   |   | x |
| ondansetron        |   | x |   | x |   |
| palbociclib        |   | x |   |   |   |
| perhexiline        |   | x |   |   |   |
| progesterone       |   | x |   | x | x |
| repaglinide        |   | x |   |   |   |
| tolazamide         |   | x |   |   |   |
| diethylstilbestrol |   |   | x |   |   |
| entinostat         |   |   | x |   |   |
| estradiol          |   |   | x |   |   |
| estrone            |   |   | x |   |   |
| tamoxifen          |   |   | x |   |   |
| tanespimycin       |   |   | x |   |   |
| benazepril         |   |   |   | x |   |
| betaxolol          |   |   |   | x | x |
| biperiden          |   |   |   | x |   |
| bupropion          |   |   |   | x | x |
| doxepin            |   |   |   | x | x |
| ibrutinib          |   |   |   | x |   |
| levonorgestrel     |   |   |   | x | x |
| losartan           |   |   |   | x |   |
| maprotiline        |   |   |   | x | x |
| omeprazole         |   |   |   | x | x |

|                     |  |  |  |   |   |
|---------------------|--|--|--|---|---|
| ramipril            |  |  |  | x |   |
| scopolamine         |  |  |  | x |   |
| sildenafil          |  |  |  | x |   |
| telmisartan         |  |  |  | x |   |
| thalidomide         |  |  |  | x |   |
| tivozanib           |  |  |  | x |   |
| valsartan           |  |  |  | x |   |
| varденаfil          |  |  |  | x |   |
| abiraterone         |  |  |  |   | x |
| acarbose            |  |  |  |   | x |
| acebutolol          |  |  |  |   | x |
| aliskiren           |  |  |  |   | x |
| aminosalicylic-acid |  |  |  |   | x |
| amlexanox           |  |  |  |   | x |
| anastrozole         |  |  |  |   | x |
| aspirin             |  |  |  |   | x |
| atomoxetine         |  |  |  |   | x |
| benzylamine         |  |  |  |   | x |
| bisoprolol          |  |  |  |   | x |
| brinzolamide        |  |  |  |   | x |
| bromfenac           |  |  |  |   | x |
| celecoxib           |  |  |  |   | x |
| chlordiazepoxide    |  |  |  |   | x |
| danazol             |  |  |  |   | x |
| desipramine         |  |  |  |   | x |
| dexketoprofen       |  |  |  |   | x |
| diazoxide           |  |  |  |   | x |
| dibenzepin          |  |  |  |   | x |
| diclofenac          |  |  |  |   | x |
| diflunisal          |  |  |  |   | x |
| dopamine            |  |  |  |   | x |
| dorzolamide         |  |  |  |   | x |
| dydrogesterone      |  |  |  |   | x |
| etazolate           |  |  |  |   | x |
| etodolac            |  |  |  |   | x |
| etoricoxib          |  |  |  |   | x |

|                       |  |  |  |  |   |
|-----------------------|--|--|--|--|---|
| exemestane            |  |  |  |  | x |
| finasteride           |  |  |  |  | x |
| glafenine             |  |  |  |  | x |
| guanethidine          |  |  |  |  | x |
| iloperidone           |  |  |  |  | x |
| isotretinoin          |  |  |  |  | x |
| ketoprofen            |  |  |  |  | x |
| ketorolac             |  |  |  |  | x |
| lansoprazole          |  |  |  |  | x |
| meclofenamic-acid     |  |  |  |  | x |
| mefenamic-acid        |  |  |  |  | x |
| megestrol-acetate     |  |  |  |  | x |
| meloxicam             |  |  |  |  | x |
| mercaptopurine        |  |  |  |  | x |
| metoprolol            |  |  |  |  | x |
| miglitol              |  |  |  |  | x |
| modafinil             |  |  |  |  | x |
| mycophenolate-mofetil |  |  |  |  | x |
| mycophenolic-acid     |  |  |  |  | x |
| nabumetone            |  |  |  |  | x |
| naproxen              |  |  |  |  | x |
| norgestimate          |  |  |  |  | x |
| norgestrel            |  |  |  |  | x |
| oxaprozin             |  |  |  |  | x |
| pantoprazole          |  |  |  |  | x |
| phentermine           |  |  |  |  | x |
| phenylbutazone        |  |  |  |  | x |
| piroxicam             |  |  |  |  | x |
| plinabulin            |  |  |  |  | x |
| probenecid            |  |  |  |  | x |
| procaine              |  |  |  |  | x |
| pseudoephedrine       |  |  |  |  | x |
| rabeprazole           |  |  |  |  | x |
| reboxetine            |  |  |  |  | x |
| rofecoxib             |  |  |  |  | x |
| ropivacaine           |  |  |  |  | x |

|               |  |  |  |  |   |
|---------------|--|--|--|--|---|
| saquinamide   |  |  |  |  | x |
| selegiline    |  |  |  |  | x |
| sulfasalazine |  |  |  |  | x |
| sulindac      |  |  |  |  | x |
| suprofen      |  |  |  |  | x |
| tacrine       |  |  |  |  | x |
| tolmetin      |  |  |  |  | x |
| tretinoin     |  |  |  |  | x |
| valdecoxib    |  |  |  |  | x |
| vecuronium    |  |  |  |  | x |

**Table S9** – Comparison of network-based and machine learning-based drug combination algorithms.

| <b>Category</b>          | <b>Requires experimental data</b> | <b>Approach</b>                                                                                      | <b>Validation</b>                 | <b>Reference</b>      |
|--------------------------|-----------------------------------|------------------------------------------------------------------------------------------------------|-----------------------------------|-----------------------|
| <i>Network based</i>     | No                                | <i>Overlapping drug-disease-drug modules in PPI network</i>                                          | <i>Computational</i>              | <i>PMID: 30867426</i> |
| <i>Network based</i>     | No                                | <i>Highest enrichment of target pathways associated to disease</i>                                   | <i>Computational/experimental</i> | <i>PMID: 34151561</i> |
| <i>Network based</i>     | No                                | <i>Combination of topological and phenotypic properties of combination candidates in PPI network</i> | <i>Computational/experimental</i> | <i>PMID: 21689469</i> |
| <i>SVM</i>               | Yes                               | <i>Predictive model based on single and combinatorial experimental data</i>                          | <i>Computational/experimental</i> | <i>PMID: 28085880</i> |
| <i>Gradient boosting</i> | Yes                               | <i>Predictive model based on the extraction of features from</i>                                     | <i>Computational</i>              | <i>PMID: 31338106</i> |

|                           |            |                                                                                        |                      |                       |
|---------------------------|------------|----------------------------------------------------------------------------------------|----------------------|-----------------------|
|                           |            | <i>combinations of drugs</i>                                                           |                      |                       |
| <i>Multiple ML models</i> | <i>Yes</i> | <i>Predictive model based on the extraction of features from combinations of drugs</i> | <i>Computational</i> | <i>PMID: 30304987</i> |
